# Supplementary material for: Propolis, Bee Honey, and Their Components Protect against Coronavirus Disease 2019 (COVID-19): A Review of In Silico, In Vitro, and Clinical Studies
Source: MDPI journal article supplement (doi:10.3390/molecules26051232), 2021-02-25
Supplement: s1 [file s1]

Supplementary Table 1. Interactions of flavonoids from propolis and bee honey with host-cell receptors proteins of SARS-CoV-2

| Proteins (PDB ID) | Compounds  | Binding energy (kcal/mol) | Main interactions                                                                                                                                                                                                                                                                                                                                         | References |
|-------------------|------------|---------------------------|-----------------------------------------------------------------------------------------------------------------------------------------------------------------------------------------------------------------------------------------------------------------------------------------------------------------------------------------------------------|------------|
| ACE-II (1R4L)     | MLN-4760*▲ | -7.28                     | Tyr127, Arg273, Phe274, Trp271, Arg273, Phe274, His345, [1]<br>Pro346, Cys361, Thr371, His374, Glu375, His378, Glu406,<br>Phe504, His505, Tyr515, Arg518                                                                                                                                                                                                  |            |
| ACE-II (1R4L)     | Rutin      | -8.98                     | HB (Asn149, His345, Asp269, Glu375, Glu406, Thr371, Tyr127, [1]<br>Asp368), PC (Arg273), PPT (His374), AI (Cys344), PAI (Tyr<br>127)<br>Tyr127, Ser128, Leu144, Glu145, Asn149, Asp269, Met270,<br>Trp271, Arg273, Phe274, Val343, Cys344, His345, Pro346,<br>Met360, Cys361, Lys363, Asp367, Asp368, Thr371, His374,<br>Glu375, Glu406, Phe504, Arg518 ▲ |            |
| ACE-II (1R4L)     | CAPE▲      | -7.76                     | Tyr127, Ser128, Leu144, Glu145, Asn149, Trp271, Val343, [1]<br>Cys344, His345, Pro346, Met360, Cys361, Thr362, Lys363,<br>Asp368, Phe504                                                                                                                                                                                                                  |            |
| ACE-II (1R4L)     | Myricetin▲ | -7.70                     | Arg273, Phe274, His345, Pro346, Thr347, Ala348, Thr371, [1]<br>His374, Glu375, His378, Glu406, Phe504, His505, Tyr515,<br>Arg518                                                                                                                                                                                                                          |            |
| ACE-II (1R4L)     | Quercetin▲ | -7.62                     | Arg273, Phe274, His345, Pro346, Thr347, Ala348, Thr371, [1]<br>Glu375, His374, His378, Glu406, Phe504, His505, Tyr515,<br>Arg518                                                                                                                                                                                                                          |            |

| Proteins (PDB ID) | Compounds           | Binding energy (kcal/mol) | Main interactions                                                                                                                                | References |
|-------------------|---------------------|---------------------------|--------------------------------------------------------------------------------------------------------------------------------------------------|------------|
| ACE-II (1R4L)     | Pinocembrin▲        | -7.46                     | Tyr127, Ser128, Leu144, Glu145, Asn149, Trp271, Val343, [1]<br>Cys344, His345, Pro346, Met360, Cys361, Thr362, Lys363,<br>Asp368                 |            |
| ACE-II (1R4L)     | Hesperetin▲         | -7.40                     | Arg273, His345, Pro346, Thr347, Ala348, Trp349, Thr371, [1]<br>His374, Glu375, His378, Glu406, Phe504, His505, Tyr510,<br>Tyr515, Arg518         |            |
| ACE-II (1R4L)     | Galangin▲           | -7.18                     | Arg273, Phe274, His345, Pro346, Thr347, Ala348, Thr371, [1]<br>His374, Glu375, His378, Glu406, Phe504, His505, Tyr515,<br>Arg518                 |            |
| ACE-II (1R4L)     | Chrysin▲            | -7.08                     | Tyr127, Ser128, Glu145, Asn149, Cys344, His345, Pro346, [1]<br>Met360, Cys361, Thr362, Lys363, Asp368, Phe504                                    |            |
| ACE-II (1R4L)     | Luteolin▲           | -6.93                     | Arg273, Phe274, His345, Pro346, Thr347, Ala348, Trp349, [1]<br>His374, Glu375, His378, Asp382, Glu402, Phe504, His505,<br>Tyr510, Tyr515, Arg518 |            |
| ACE-II (1R4L)     | Caffeic acid▲       | -5.53                     | Arg273, His345, Pro346, Thr347, Ala348, His374, Glu375, [1]<br>His378, Phe504, His505, Tyr515                                                    |            |
| TMPRSS2 (O15393)  | Camostat mesylate * | -5.90                     | HB (Gly464), PP (Val275, Gln276, Val278, Val 280, His296, [2]<br>Cys297, Leu302, Asp435, Ser436, Cys437, Gln438, Gly439,                         |            |

| Proteins (PDB ID) | Compounds             | Binding energy (kcal/mol) | Main interactions                                                                                                                                                   | References |
|-------------------|-----------------------|---------------------------|---------------------------------------------------------------------------------------------------------------------------------------------------------------------|------------|
|                   |                       |                           | Ser441, Thr459, Trp461, Gly462, Cys465, Ala466, Gly472, Val473)                                                                                                     |            |
| TMPRSS2 (O15393)  | CAPE                  | -6.20                     | HB (Gly464, Ser436), PP (Cys281, Val280, His296, Cys297, [2] Glu299, Leu302, Asp435, Cys437, Gln438, Gly439, Asp440, Ser441, Thr459, Ser460, Trp461, Gly462, Cys465 |            |
| S1 subunit (6m0j) | <b>Dexamethasone*</b> | -7.9                      |                                                                                                                                                                     | [3]        |
| S1 subunit (6m0j) | <b>Naringin</b>       | -9.8                      | HB (Asp367, Thr371, Lys441, Ser409, Glu406) hydrophobic [3] (Asn290, Ile291, His374, Leu370, Leu410, Ala413, Pro415, Phe438, Gln442)                                |            |
| S1 subunit (6m0j) | <b>Rutin</b>          | -9.2                      | NR                                                                                                                                                                  |            |
| S1 subunit (6m0j) | <b>Galangin</b>       | -8.2                      | NR                                                                                                                                                                  |            |
| S1 subunit (6m0j) | <b>Quercetin</b>      | -8.2                      | NR                                                                                                                                                                  |            |
| S1 subunit (6m0j) | <b>Chrysin</b>        | -8.1                      | NR                                                                                                                                                                  |            |
| S1 subunit (6m0j) | <b>Luteolin</b>       | -8.0                      | NR                                                                                                                                                                  |            |
| S1 subunit (7BZ5) | Remdesivir*           | -165.9⊙                   | 3HB (Arg509, Asn343, Ala344)                                                                                                                                        | [4]        |
| S1 subunit (7BZ5) | Avigan*               | -46.3⊙                    | 3HB (Arg509)                                                                                                                                                        | [4]        |
| S1 subunit (7BZ5) | Hydroxychloroquine*   | -79.8⊙                    | 2HB (Arg509)                                                                                                                                                        | [4]        |

| Proteins (PDB ID)                                        | Compounds       | Binding energy (kcal/mol) | Main interactions                                                                                                                                                          | References |
|----------------------------------------------------------|-----------------|---------------------------|----------------------------------------------------------------------------------------------------------------------------------------------------------------------------|------------|
| S1 subunit (7BZ5)                                        | Rutin           | −94.3⊙                    | 1HB (Glu484)                                                                                                                                                               | [4]        |
| S1 subunit (7BZ5)                                        | CAPE            | −77.8⊙                    | 2HB (Asn437, Ala372)                                                                                                                                                       | [4]        |
| S1 subunit (7BZ5)                                        | Pinobanksin     | −77.4⊙                    | 3HB (Trp436, Phe342)                                                                                                                                                       | [4]        |
| S1 subunit (7BZ5)                                        | Quercetin       | −67.8⊙                    | 2HB (Gln474)                                                                                                                                                               | [4]        |
| S1 subunit (7BZ5)                                        | Chrysin         | −66.2⊙                    | 1HB (Asn343)                                                                                                                                                               | [4]        |
| S1 subunit (7BZ5)                                        | Kaempferol      | −62.3⊙                    | 2HB (Trp436)                                                                                                                                                               | [4]        |
| S1 subunit (7BZ5)                                        | Pinocembrin     | −60.5⊙                    | 1HB (Gly482)                                                                                                                                                               | [4]        |
| S1 subunit (7BZ5)                                        | Galangin        | −59.5⊙                    | 1HB (Gly482)                                                                                                                                                               | [4]        |
| S1 subunit (7BZ5)                                        | P-coumaric acid | −56.5⊙                    | 3HB (Arg509, Ser373)                                                                                                                                                       | [4]        |
| PP2A-B56 (5SWF-A) <sup>293</sup> LDPLSE <sup>298</sup> ◆ |                 | -4.9                      | Leu296 formed HB with the hydrophobic pocket, and Glu298 formed ionic bonds with amino acid residues in the positively-charged region in PP2A B56. ○                       | [5]        |
| PP2A-B56 (5SWF-A)Artepillin C                            |                 | -6.1                      | The two prenyl groups of artepillin C were docked into the {Maaroufi, same two pockets as in <sup>293</sup> LDPLSE <sup>298</sup> ; however, only through 2020 #1892 HB. ○ |            |
| Mpro (6YNQ)                                              | Remdesivir*     | − 8.6                     | HB (Glu A: 166, His A: 41, Thr A: 25) PA (Pro A: 168)                                                                                                                      | [6]        |

| Proteins (PDB ID) | Compounds         | Binding energy (kcal/mol) | Main interactions                                                                                                                               | References |
|-------------------|-------------------|---------------------------|-------------------------------------------------------------------------------------------------------------------------------------------------|------------|
| Mpro (6YNQ)       | Rutin             | - 8.7                     | HB (CYS A: 145, HIS A: 163, SER A: 46, THR A: 45, HIS A: 41, [6]<br>GLU A: 166, And GLN A: 189) Van der Waals (Asn A: 142.) PA<br>(Met A: 49)   |            |
| Mpro (6Y2F)       | 13b*              | -8.2                      | HB (His41, Gly143, Ser144, Cys145, Glu166) HDPC (Thr25, [7]<br>Cys44, Met49, Leu141, Asn142, His163, His164, Met165,<br>Leu167, Asp187, Gln189) |            |
| Mpro (6Y2F)       | 14b*              | -7.2                      | HB (Phe140, Glu166) HDPC (His41, Met49, Leu141, Asn142, [7]<br>His163, His164, Met165, Leu167, Pro168, Asp187, Arg188,<br>Gln189)               |            |
| Mpro (6Y2F)       | Broussoflavonol F | -7.8                      | HB (Gly143, Ser144, Cys145) HDPC (Thr26, His41, Met49, [7]<br>Leu141, Asn142, His163, His164, Met165, Glu166, Arg188,<br>Gln189)                |            |
| Mpro (6Y2F)       | Glyasperin A      | -7.8                      | HB (Thr25, His164, Arg188) HDPC (His41, Cys145, Met165, [7]<br>Glu166, Val186, Asp187, Gln189, Thr190, Gln192)                                  |            |
| Mpro (6Y2F)       | Sulabiroins A     | -7.6                      | HB (Glu166) HDPC (His41, Asn142, His164, Met165, Asp187, [7]<br>Arg188, Gln189)                                                                 |            |
| RdRp(7M71)        | Theaflavin*       | -11.2                     | HB (Ala550, Trp617, Aap623, Asp760, Glu811), PA (Asp760, [8]<br>Asp761), PAI (Ala550, Cys622)                                                   |            |
| RdRp(7M71)        | Rutin             | -11.7                     | HB (Tyr619, Lys621, Asp760, Glu811), PA (Glu811)                                                                                                | [8]        |

| Proteins (PDB ID) | Compounds                   | Binding energy (kcal/mol) | Main interactions                                                                                                  | References |
|-------------------|-----------------------------|---------------------------|--------------------------------------------------------------------------------------------------------------------|------------|
| RdRp(7M71)        | Quercetin-7-O-glucuronide   | -10.5                     | HB (Arg553, Ser549, Tyr619, Trp800, Glu811, Cys813), PC [8]<br>(ARG555, LYS551)                                    |            |
| RdRp(7M71)        | Quercetin-3'-O-glucuronide  | -10.5                     | HB (Cys622, Asp623, Asp760, Glu811, Cys813, Ser814), PA [8]<br>(Asp618, Asp761)                                    |            |
| RdRp(7M71)        | Quercetin-3-O-glucuronide   | -10.2                     | HB (Thr556, Tyr619, Lys621, Thr687, Asn691, Ser759, Asp760), [8]<br>PC (Arg555, Arg553), PA (Asp623), PAI (Lys621) |            |
| RdRp(7M71)        | Quercetin-7-O-sulfate-9.4   |                           | HB (Lys545, Lys621, Arg624), PC (Arg555, Arg553), PA [8]<br>(Asp623), PAI (Arg624)                                 |            |
| RdRp(7M71)        | Quercetin-3-O-sulfate-8.8   |                           | HB (Asp452, Arg553, Thr556, Tyr619), PC (Arg553), PA [8]<br>(Asp623)                                               |            |
| RdRp(7M71)        | Quercetin-3'-O-sulfate      | -8.8                      | HB (Ser814), PA (Asp760, Asp761)                                                                                   | [8]        |
| RdRp(7M71)        | Quercetin                   | -8.2                      | HB (Asp760, Trp800), PA (Asp761)                                                                                   | [8]        |
| RdRp(7M71)        | Nicotiflorin                | -11.3                     | HB (Tyr619, Lys621, Asp760), PA (Glu811)                                                                           | [8]        |
| RdRp(7M71)        | Kaempferol-4'-O-glucuronide | -10.2                     | HB (Asp618, Lys621, Asp623, Asp761), PA (Glu811)                                                                   | [8]        |
| RdRp(7M71)        | Kaempferol-3-O-glucuronide  | -10.1                     | HB (Tyr619, Asp760, Asp761, Glu811, Cys813)                                                                        | [8]        |

| Proteins (PDB ID) | Compounds                  | Binding energy (kcal/mol) | Main interactions                                                                            | References |
|-------------------|----------------------------|---------------------------|----------------------------------------------------------------------------------------------|------------|
| RdRp(7M71)        | Kaempferol-7-O-glucuronide | -10.0                     | HB (Asp760, Trp800), PA (Glu811), PAI (Lys798)                                               | [8]        |
| RdRp(7M71)        | Kaempferol-7-O-sulfate     | -9.3                      | HB (Lys545, Lys621, Arg624), PC (Arg553, Arg555), PA (Asp623), PAI (Arg624)                  | [8]        |
| RdRp(7M71)        | Kaempferol-4'-O-sulfate    | -9.2                      | HB (Arg553, Lys621, Thr687, Asn691), PC (Arg553), PA (Asp623), PS (Cys622), PAI (Lys621)     | [8]        |
| RdRp(7M71)        | Kaempferol-3-O-sulfate     | -8.7                      | HB (Arg553, Arg555, Thr556, Tyr619, Lys621, Arg624), PC (Arg553), PA (Asp623), PAI (Lys621)  | [8]        |
| RdRp(7M71)        | Kaempferol                 | -7.7                      | HB (Tyr619, Ser814), PA (Asp760, Asp761)                                                     | [8]        |
| 3CLpro(6W63)      | x77*                       | -12.4                     | HB (Gly143, Glu166), PS (Met49), PAI (Leu27, His41, Pro168), PAm (Leu141)                    | [8]        |
| 3CLpro(6W63)      | Rutin                      | -10.3                     | HB (Asn142, Asp187), PS (Cys145, Met165), PP (His41), PC (His41), PAI (Cys44, Met49, Cys145) | [8]        |
| 3CLpro(6W63)      | Quercetin-7-O-glucuronide  | -10.9                     | HB (Thr26, Glu166, Gln189), PP (His41), PC (His41), PAI (Met49)                              | [8]        |
| 3CLpro(6W63)      | Quercetin-3'-O-glucuronide | -10.2                     | HB (Gly143, His164), PAI (Met49)                                                             | [8]        |

| Proteins (PDB ID) | Compounds                   | Binding energy (kcal/mol) | Main interactions                                                                          | References |
|-------------------|-----------------------------|---------------------------|--------------------------------------------------------------------------------------------|------------|
| 3CLpro(6W63)      | Quercetin-3-O-glucuronide   | -10.7                     | HB (Thr25, Cys44, Asn142, Ser144, His163, Met165, Glu166, [8] Arg188), PAI (Met49, Met165) |            |
| 3CLpro(6W63)      | Quercetin-7-O-sulfate       | -9.5                      | HB (Thr25, Ser144, Glu166), PS (Cys145), PC (His41), PAI (Met49, Met165) [8]               |            |
| 3CLpro(6W63)      | Quercetin-3-O-sulfate       | -9.5                      | HB (Asn142, Thr190), PS (Met165), Psi (Gln189), PAI (Met165) [8]                           |            |
| 3CLpro(6W63)      | Quercetin-3'-O-sulfate      | -9.2                      | HB (Met49, Gly143, Asp187), Psi (Thr25), PP (His41), PC (His41), PAI (Cys44, Met49) [8]    |            |
| 3CLpro(6W63)      | Quercetin                   | -8.3                      | HB (Glu166), PS (Met49), PC (His41), PAI (Met165) [8]                                      |            |
| 3CLpro(6W63)      | Nicotiflorin                | -11.2                     | HB (Asn142, Asp187), PP (His41), PS (Cys145), PC (His41), PAI (Cys44, Met49, Cys145) [8]   |            |
| 3CLpro(6W63)      | Kaempferol-7-O-glucuronide  | -10.9                     | HB (Thr24, Asp187), PP(His41), PS(Cys145), PC (His41), PAI (Cys44, Met49, Cys145) [8]      |            |
| 3CLpro(6W63)      | Kaempferol-4'-O-glucuronide | -9.7                      | HB (Thr24, Cys44), PS(Met49), PP(His41), PAI (Cys44, Met49) [8]                            |            |
| 3CLpro(6W63)      | Kaempferol-3-O-glucuronide  | -9.1                      | HB (Asn142, Glu166), PP (His41), PC(His41), PAI (Cys44, Met49) [8]                         |            |
| 3CLpro(6W63)      | Kaempferol-7-O-sulfate      | -9.1                      | HB (Gly143, Glu166) ,PS (Cys145), PP (His41), PC (His41), PAI (Cys44, Met49, Cys145) [8]   |            |



| Proteins (PDB ID) | Compounds               | Binding energy (kcal/mol) | Main interactions                                                                                      | References |
|-------------------|-------------------------|---------------------------|--------------------------------------------------------------------------------------------------------|------------|
| 3CLpro(6W63)      | Kaempferol-4'-O-sulfate | -9.0                      | HB (Leu141, His163), PS (Cys145), PP (His41)                                                           | [8]        |
| 3CLpro(6W63)      | Kaempferol-3-O-sulfate  | -9.4                      | HB (Met49, His41, Gly143, Glu166), PS (Cys44, Met49, [8] Cys145), PP (His41), PC (His41), PAI (Cys145) |            |
| 3CLpro(6W63)      | Kaempferol              | -8.1                      | HB (Met49, Gly143, Asp187), PS (Cys44, Cys145), PP (His41), [8] PC (His41), PAI (Cys145)               |            |
| 3CLpro(6LU7)      | N3*                     | -133.6◎                   | 5HB (Gly71, Lys97, Gly11, Glu14)                                                                       | [4]        |
| 3CLpro(6LU7)      | Remdesivir*             | -136.4◎                   | 10HB (Gln110, Thr111, Thr292, Phe294, Asp153, Ser158)                                                  | [4]        |
| 3CLpro(6LU7)      | Avigan*                 | -33.3◎                    | 6HB (Gln110, Thr111, Thr292, Asn151, Asp295)                                                           | [4]        |
| 3CLpro(6LU7)      | Hydroxychloroquine*     | -65.9◎                    | 3HB (Gln110, Thr111, Thr292)                                                                           | [4]        |
| 3CLpro(6LU7)      | Rutin                   | -92.8◎                    | 18HB (Lys102, Gln110, Asn151, Ser158, Thr111, Ile152, [4] Asp153)                                      |            |
| 3CLpro(6LU7)      | CAPE                    | -67.8◎                    | 5HB (Lys102, Asp153)                                                                                   | [4]        |
| 3CLpro(6LU7)      | Quercetin               | -57.5◎                    | 10HB (Lys102, Gln110, Thr111, Asp153, Asp295)                                                          | [4]        |
| 3CLpro(6LU7)      | Kaempferol              | -56.3◎                    | 7HB (Lys5, Lys137, Tyr239, Glu288, Glu290)                                                             | [4]        |
| 3CLpro(6LU7)      | Pinocembrin             | -56.2◎                    | 3HB (Gly71, N119, Ser121)                                                                              | [4]        |

| Proteins (PDB ID) | Compounds           | Binding energy (kcal/mol) | Main interactions                          | References |
|-------------------|---------------------|---------------------------|--------------------------------------------|------------|
| 3CLpro(6LU7)      | Pinobanksin         | -54.1◎                    | 5HB (Gln110, Thr111, Ser158)               | [4]        |
| 3CLpro(6LU7)      | Galangin            | -53.2◎                    | 4HB (Gly71, Glu14, Gly15, Ser121)          | [4]        |
| 3CLpro(6LU7)      | Chrysin             | -52.9◎                    | 8HB (Lys102, Gln110, Thr111, S158, Asp295) | [4]        |
| 3CLpro(6LU7)      | P-Coumaric acid     | -45.5◎                    | 5HB (Thr111, Thr292, Ser158)               | [4]        |
| 3CLpro(6LU7)      | Benzoic acid        | -35.4◎                    | 4HB (Gln110, Thr111)                       | [4]        |
| Mpro (5R7Y)       | 3-phenyllactic acid | -5.867                    | HB (GLN-189), PP(HIE-41)                   | [8]        |
| Mpro (5R7Y)       | Caffeic acid        | -4.387                    | HB (GLN-189, HIE-164)                      | [8]        |
| Mpro (5R7Y)       | CAPE                | -6.386                    | HB (THR-24, THR-26), PP(HIE-41)            | [8]        |
| Mpro (5R7Y)       | Chrysin             | -6.097                    | HB (SER-46, THR-24, THR-26), PP(HIE-41)    | [8]        |
| Mpro (5R7Y)       | Galangin            | -6.307                    | HB (SER-46, THR-24) , PP(HIE-41)           | [8]        |

\* Reference compound; ◎ affinity of binding is expressed as Molsoft Internal Coordinate Mechanics (ICM) score; ▲ reports on the nature of binding interactions are missing; ◆ a motif in S1 subdomain of spike protein; ○ the study did not state amino acid residues in PP2A B56 that were involved in the interactions with <sup>293</sup>LDPLSE<sup>298</sup> and artemisinin C. **Abbreviations:** ACE-II: angiotensin-converting enzyme-related carboxypeptidase; PP2A-B56: B56 regulatory unit of phosphatase 2A; TMPRSS2: transmembrane protease serine 2; 3CLpro/Mpro: chymotrypsin-like protease/main protease; RdRp: RNA-dependent RNA polymerase; CAPE: caffeic acid phenethyl ester; MLN-4760: ((S,S)-2-1-Carboxy-2-[3-(3,5-Dichloro-Benzyl)-3h-Imidazol-4-Yl]-Ethylamino-4-Methyl-Pentanoic Acid); HB: hydrogen bond; PS:  $\pi$ -sulfur; PA:  $\pi$ -anion; PC:  $\pi$ -cation; PP:  $\pi$ - $\pi$ ; AL: alkyl; PAI:  $\pi$ -alkyl; PPT:  $\pi$ - $\pi$  T shape; Psi:  $\pi$ -sigma; PAm:  $\pi$ -amide; HDPC: hydrophobic interactions that were not specified.

## References

1. Güler, H.I.; Tatar, G.; Yildiz, O.; Belduz, A.O.; Kolayli, S. Investigation of potential inhibitor properties of ethanolic propolis extracts against ACE-II receptors for COVID-19 treatment by Molecular Docking Study. *ScienceOpen* **2020**, doi:10.14293/S2199-1006.1.SOR-PP5BWN4.v1.
2. Kumar, V.; Dhanjal, J.K.; Bhargava, P.; Kaul, A.; Wang, J.; Zhang, H.; Kaul, S.C.; Wadhwa, R.; Sundar, D. Withanone and withaferin-A are predicted to interact with transmembrane protease serine 2 (TMPRSS2) and block entry of SARS-CoV-2 into cells. *J Biomol Struct Dyn* **2020**, 1-27, doi:10.1080/07391102.2020.1775704.
3. Jain, A.S.; Sushma, P.; Dharmashekar, C.; Beelagi, M.S.; Prasad, S.K.; Shivamallu, C.; Prasad, A.; Syed, A.; Marraiki, N.; Prasad, K.S. In silico evaluation of flavonoids as effective antiviral agents on the spike glycoprotein of SARS-CoV-2. *Saudi J Biol Sci* **2021**, 28, 1040-1051, doi:https://doi.org/10.1016/j.sjbs.2020.11.049.
4. Refaat, H.; Mady, F.M.; Sarhan, H.A.; Rateb, H.S.; Alaaeldin, E. Optimization and evaluation of propolis liposomes as a promising therapeutic approach for COVID-19. *Int J Pharm* **2020**, 120028-120028, doi:10.1016/j.ijpharm.2020.120028.
5. Maaroufi, H. The Spike Protein S1 Subunit of SARS-CoV-2 Contains an LxxIxE-like Motif that is Known to Recruit the Host PP2A-B56 Phosphatase. *bioRxiv* **2020**, 2020.2004.2001.020941, doi:10.1101/2020.04.01.020941.
6. Arora, S.; Lohiya, G.; Moharir, K.; Shah, S.; Yende, S. Identification of Potential Flavonoid Inhibitors of the SARS-CoV-2 Main Protease 6YNQ: A Molecular Docking Study. *DCM* **2020**, 3, 239-248, doi:https://doi.org/10.1016/j.dcm.2020.12.003.
7. Sahlan, M.; Irdiani, R.; Flamandita, D.; Aditama, R.; Alfarraj, S.; Ansari, M.J.; Khayrani, A.C.; Pratami, D.K.; Lischer, K. Molecular interaction analysis of Sulawesi propolis compounds with SARS-CoV-2 main protease as preliminary study for COVID-19 drug discovery. *J. King Saud Univ. Sci.* **2021**, 33, 101234, doi:https://doi.org/10.1016/j.jksus.2020.101234.
8. Silva, F.M.A.d.; Silva, K.P.A.d.; Oliveira, L.P.M.d.; Costa, E.V.; Koolen, H.H.F.; Pinheiro, M.L.B.; Queiroz, A.; Souza, L.d.; Souza, A.D.L.d. Flavonoid glycosides and their putative human metabolites as potential inhibitors of the SARS-CoV-2 main protease (Mpro) and RNA-dependent RNA polymerase (RdRp). *Mem Inst Oswaldo Cruz E-pub* **2020**, 115:e200207, doi:10.1590/0074-02760200207.
